# Supplementary material
Source: publisher figshare collection journal article supplement (https://acs.figshare.com/ndownloader/files/5726094)
Supplement: Supplementary file 1 [file 5726094]

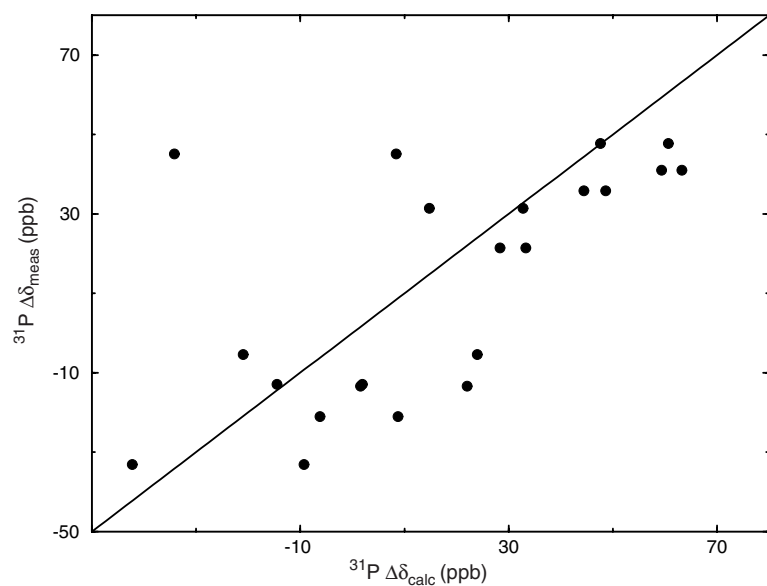

Supporting Information Figure 1. Correlation between observed  $\Delta\delta^{31}\text{P}$  values and those predicted by the 1BNA crystal structure of  $\text{d}(\text{CGCGAATTCGCG})_2$ .

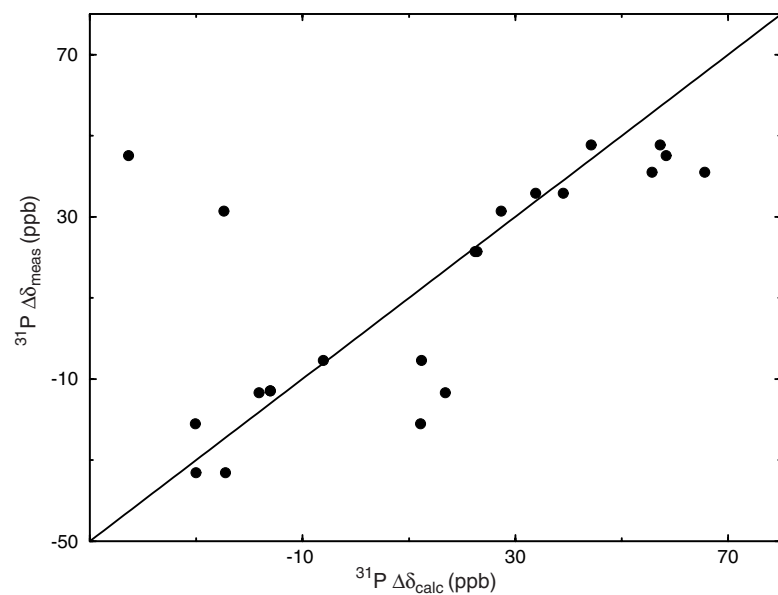

Supporting Information Figure 1. Correlation between observed  $\Delta\delta^{31}\text{P}$  values and those predicted by the 355D crystal structure of  $\text{d}(\text{CGCGAATTCGCG})_2$ .
